# Supplementary material for: Identification of clinical and urine biomarkers for uncomplicated urinary tract infection using machine learning algorithms
Source: Springer Nature journal article supplement (doi:10.1038/s41598-019-55523-x), 2019-12-23

## Supplementary Materials

### Identification of clinical and urine biomarkers for uncomplicated urinary tract infection using machine learning algorithms

Amal A. H. Gadalla<sup>1\*</sup>, Ida M. Friberg<sup>2</sup>, Ann Kift-Morgan<sup>2</sup> Jingjing Zhang<sup>2</sup>, Matthias Eberl<sup>2,3</sup>, Nicholas Topley<sup>2,3</sup>, Ian Weeks<sup>3,4</sup>, Simone Cuff<sup>2,3,4</sup>, Mandy Wootton<sup>5</sup>, Micaela Gal<sup>1</sup>, Gita Parekh<sup>6</sup>, Paul Davis<sup>6</sup>, Clive Gregory<sup>1</sup>, Kerenza Hood<sup>7</sup>, Kathryn Hughes<sup>1</sup>, Christopher Butler<sup>1,8†</sup> and Nick A Francis<sup>1,3†</sup>

<sup>1</sup>Division of Population Medicine, School of Medicine, College of Biomedical and Life Sciences, Cardiff University, Cardiff, United Kingdom

<sup>2</sup>Division of Infection & Immunity, School of Medicine, College of Biomedical and Life Sciences, Cardiff University, Cardiff, United Kingdom

<sup>3</sup>Systems Immunity Research Institute, Cardiff University, Cardiff, United Kingdom

<sup>4</sup>Clinical Innovation Hub, School of Medicine, College of Biomedical and Life Sciences, Cardiff University, Cardiff, United Kingdom

<sup>5</sup>Specialist Antimicrobial Chemotherapy Unit, Public Health Wales Microbiology Cardiff, University Hospital of Wales, Cardiff, United Kingdom

<sup>6</sup>Mologic Ltd., Bedford Technology Park, Thurleigh, Bedford, United Kingdom

<sup>7</sup>Centre for Trials Research, School of Medicine, College of Biomedical and Life Sciences, Cardiff University, Cardiff, United Kingdom

<sup>8</sup>Nuffield Department of Primary Care Health Sciences, University of Oxford, Oxford, United Kingdom

\* **Corresponding author:** GadallaA1@cardiff.ac.uk

† joint last authors

## Supplementary Materials

**Table S1:** Performance of selection and merged models on test data subset

| Data set                                                         | Algorithm | AUC                              | PPV                 | NPV                 | LR+                  | LR-                 | F1 score <sup>1</sup> | Selected predictors                 |
|------------------------------------------------------------------|-----------|----------------------------------|---------------------|---------------------|----------------------|---------------------|-----------------------|-------------------------------------|
| <b>PHE UTI classification, UTI prevalence 53.7%</b>              |           |                                  |                     |                     |                      |                     |                       |                                     |
| Clinical markers with cloudiness                                 | RF+RFE    | 0.66<br>(0.53-0.79) <sup>2</sup> | 0.68<br>(0.49-0.83) | 0.65<br>(0.43-0.83) | 1.80<br>(1.10-3.08)  | 0.47<br>(0.24-0.87) | 0.70<br>(0.58-0.82)   | Cloudiness                          |
| Clinical markers with turbidity                                  | RF+RFE    | 0.73<br>(0.61-0.85)              | 0.77<br>(0.54-0.91) | 0.63<br>(0.44-0.78) | 2.95<br>(1.26-6.80)  | 0.51<br>(0.33-0.81) | 0.67<br>(0.54-0.80)   | Turbidity                           |
| Immunological markers                                            | RF+RFE    | 0.83<br>(0.72-0.94)              | 0.77<br>(0.57-0.89) | 0.75<br>(0.53-0.89) | 2.82<br>(1.47-5.46)  | 0.29<br>(0.14-0.60) | 0.77<br>(0.66-0.88)   | 14 biomarkers selected <sup>3</sup> |
| Selected clinical + selected immunological markers               | RF        | #                                |                     |                     |                      |                     |                       |                                     |
| Clinical markers with cloudiness                                 | SVM+RFE   | 0.66<br>(0.53-0.79)              | 0.68<br>(0.49-0.83) | 0.65<br>(0.43-0.83) | 1.80<br>(1.10-3.08)  | 0.47<br>(0.24-0.87) | 0.70<br>(0.54-0.80)   | Cloudiness                          |
| Clinical markers with turbidity                                  | SVM+RFE   | 0.73<br>(0.61-0.85)              | 0.77<br>(0.54-0.91) | 0.63<br>(0.44-0.78) | 2.95<br>(1.26-6.80)  | 0.51<br>(0.33-0.81) | 0.67<br>(0.54-0.80)   | Turbidity                           |
| Immunological markers                                            | SVM+RFE   | 0.81<br>(0.69-0.93)              | 0.79<br>(0.59-0.91) | 0.73<br>(0.52-0.88) | 3.17<br>(1.53-6.54)  | 0.32<br>(0.16-0.62) | 0.77<br>(0.66-0.88)   | NGAL                                |
| Selected clinical with cloudy+ selected immunological markers    | SVM       | 0.81<br>(0.68-0.93)              | 0.85<br>(0.65-0.95) | 0.78<br>(0.57-0.90) | 4.94<br>(1.98-12.40) | 0.25<br>(0.12-0.51) | 0.82<br>(0.72-0.92)   | Cloudiness and NGAL                 |
| Selected clinical with turbidity+ selected immunological markers | SVM       | 0.79<br>(0.66-0.92)              | 0.76<br>(0.56-0.89) | 0.72<br>(0.54-0.87) | 2.71<br>(1.40-5.25)  | 0.33<br>(0.17-0.66) | 0.76<br>(0.65-0.87)   | Turbidity and NGAL                  |
| <b>EAU UTI classification, UTI prevalence 64.8%</b>              |           |                                  |                     |                     |                      |                     |                       |                                     |
| Clinical markers with cloudiness                                 | RF+RFE    | 0.69<br>(0.55-0.82)              | 0.79<br>(0.61-0.91) | 0.57<br>(0.34-0.77) | 2.00<br>(1.08-3.75)  | 0.41<br>(0.21-0.76) | 0.76<br>(0.65-0.87)   | Cloudiness                          |
| Clinical markers with turbidity                                  | RF+RFE    | 0.68<br>(0.55-0.81)              | 0.82<br>(0.60-0.94) | 0.48<br>(0.31-0.67) | 2.57<br>(1.03-6.49)  | 0.58<br>(0.39-0.85) | 0.66<br>(0.53-0.79)   | Turbidity                           |

## Supplementary Materials

|                                                                   |         |                     |                     |                     |                     |                     |                     |                                                                                     |
|-------------------------------------------------------------------|---------|---------------------|---------------------|---------------------|---------------------|---------------------|---------------------|-------------------------------------------------------------------------------------|
| Immunological markers                                             | RF+RFE  | 0.80<br>(0.68-0.93) | 0.75<br>(0.58-0.87) | 0.64<br>(0.36-0.86) | 1.62<br>(1.04-2.55) | 0.30<br>(0.12-0.76) | 0.80<br>(0.69-0.91) | NGAL, MMP9, IL-17A, IFN- $\gamma$ , Fibrinogen, IL-1 $\beta$ , IL-16 and CCL2       |
| Selected clinical + selected immunological markers                | RF      | #                   |                     |                     |                     |                     |                     |                                                                                     |
| Clinical markers with cloudiness                                  | SVM+RFE | 0.72<br>(0.58-0.86) | 0.71<br>(0.55-0.84) | 0.58<br>(0.29-0.83) | 1.37<br>(0.94-1.96) | 0.38<br>(0.14-1.04) | 0.78<br>(0.67-0.89) | Cloudiness and severity of being unwell                                             |
| Clinical markers with turbidity                                   | SVM+RFE | 0.82<br>(0.70-0.93) | 0.77<br>(0.60-0.88) | 0.67<br>(0.39-0.87) | 1.83<br>(1.11-2.96) | 0.26<br>(0.11-0.67) | 0.81<br>(0.71-0.91) | Turbidity, severity of being unwell and severity of foul smell in urine             |
| Immunological markers                                             | SVM+RFE | 0.85<br>(0.73-0.96) | 0.74<br>(0.59-0.86) | 0.73<br>(0.39-0.93) | 1.57<br>(1.06-2.35) | 0.21<br>(0.06-0.69) | 0.82<br>(0.72-0.92) | NGAL and MMP9                                                                       |
| Selected clinical with cloudiness+ selected immunological markers | SVM     | 0.71<br>(0.55-0.87) | 0.73<br>(0.57-0.85) | 0.70<br>(0.35-0.92) | 1.46<br>(1.01-2.07) | 0.22<br>(0.07-0.82) | 0.81<br>(0.71-0.91) | Cloudiness, severity of being unwell, NGAL and MMP9                                 |
| Selected clinical with Turbidity+ selected immunological markers  | SVM     | 0.85<br>(0.73-0.96) | 0.77<br>(0.61-0.88) | 0.82<br>(0.48-0.97) | 1.77<br>(1.16-2.77) | 0.13<br>(0.03-0.52) | 0.85<br>(0.75-0.95) | Turbidity, severity of being unwell, severity of foul smell in urine, NGAL and MMP9 |

<sup>1</sup> F1-score: harmonic mean of precision and recall

<sup>2</sup> 95% confidence interval of the performance metric

<sup>3</sup> NGAL, MMP9, IL-1 $\beta$ , HSA, Desmosine, IL-16, CCL3, Fibrinogen, CCL17, IL-17A, MMP8, IL-12p70, IL-8 and CCL13

# merging was not considered due to the large number of selected predictors

AUC: Area under the curve

PPV: Positive predictive value

NPP: Negative predictive value

LR+ and LR-: positive and negative likelihood ratio

## **Supplementary Materials**

SVM: Support vector machine

RF: Random Forest

RFE: Recursive Feature Elimination

NGAL: Neutrophil gelatinase-associated lipocalin

MMP: Matrix metalloproteinase

IL: Interleukin

HSA: Human serum albumin

CCL: CC chemokine ligands

IFN- $\gamma$ : Interferon- $\gamma$

## Supplementary Materials

**Table S2:** Hyperparameters for models following predictors' selection. For the selected predictors please refer to Table 2 and Table S1.

| Data set                                                           | RF: mtry      | SVM: sigma | SVM: C | Selected predictors                                              |
|--------------------------------------------------------------------|---------------|------------|--------|------------------------------------------------------------------|
| <b>POETIC UTI classification, UTI prevalence 42.6%</b>             |               |            |        |                                                                  |
| Clinical markers with cloudiness                                   | One predictor |            |        | Cloudiness                                                       |
| Clinical markers with turbidity                                    | One predictor |            |        | Turbidity                                                        |
| Immunological markers                                              | 2             |            |        | IL-1 $\beta$ and MMP9                                            |
| Selected clinical with cloudiness + selected immunological markers | 2             |            |        | Cloudiness, IL-1 $\beta$ and MMP9                                |
| Selected clinical with turbidity + selected immunological markers  | 3             |            |        | Turbidity, IL-1 $\beta$ and MMP9                                 |
| Clinical markers with cloudiness                                   |               | 0.25       | 0.25   | Cloudiness                                                       |
| Clinical markers with turbidity                                    |               | 0.38       | 1      | Turbidity and age category                                       |
| Immunological markers                                              |               | 0.66       | 0.25   | MMP9, NGAL, IL-8/CXCL8 and IL-1 $\beta$                          |
| Selected clinical with cloudy+ selected immunological markers      |               | 0.51       | 0.25   | Cloudiness, MMP9, NGAL, IL-8/CXCL8 and IL-1 $\beta$              |
| Selected clinical with turbidity+ selected immunological markers   |               | 0.24       | 0.25   | Turbidity, age category, MMP9, NGAL, IL-8/CXCL8 and IL-1 $\beta$ |
| <b>PHE UTI classification, UTI prevalence 53.7%</b>                |               |            |        |                                                                  |
| Clinical markers with cloudiness                                   | One predictor |            |        | Cloudiness                                                       |

## Supplementary Materials

|                                                                   |                   |      |      |                                                                               |
|-------------------------------------------------------------------|-------------------|------|------|-------------------------------------------------------------------------------|
| Clinical markers with turbidity                                   | One predictor     |      |      | Turbidity                                                                     |
| Immunological markers                                             | Not taken further |      |      | 14 biomarkers selected <sup>3</sup>                                           |
| Selected clinical + selected immunological markers                | Not trained       |      |      |                                                                               |
| Clinical markers with cloudiness                                  |                   | 0.25 | 0.25 | Cloudiness                                                                    |
| Clinical markers with turbidity                                   |                   | 0.30 | 1    | Turbidity                                                                     |
| Immunological markers                                             |                   | 97.6 | 0.5  | NGAL                                                                          |
| Selected clinical with cloudiness+ selected immunological markers |                   | 21.5 | 1    | Cloudiness and NGAL                                                           |
| Selected clinical with Turbidity+ selected immunological markers  |                   | 55.4 | 0.5  | Turbidity and NGAL                                                            |
| <b>EAU UTI classification, UTI prevalence 64.8%</b>               |                   |      |      |                                                                               |
| Clinical markers with cloudiness                                  | One predictor     |      |      | Cloudiness                                                                    |
| Clinical markers with turbidity                                   | One predictor     |      |      | Turbidity                                                                     |
| Immunological markers                                             | Not taken further |      |      | NGAL, MMP9, IL-17A, IFN- $\gamma$ , Fibrinogen, IL-1 $\beta$ , IL-16 and CCL2 |
| Selected clinical + selected immunological markers                | Not trained       |      |      |                                                                               |
| Clinical markers with cloudiness                                  |                   | 1.59 | 1    | Cloudiness and severity of being unwell                                       |

**Supplementary Materials**

|                                                                   |      |      |                                                                                     |
|-------------------------------------------------------------------|------|------|-------------------------------------------------------------------------------------|
| Clinical markers with turbidity                                   | 0.44 | 1    | Turbidity, severity of being unwell and severity of foul smell in urine             |
| Immunological markers                                             | 2.27 | 0.25 | NGAL and MMP9                                                                       |
| Selected clinical with cloudiness+ selected immunological markers | 0.32 | 0.25 | Cloudiness, severity of being unwell, NGAL and MMP9                                 |
| Selected clinical with Turbidity+ selected immunological markers  | 0.15 | 0.25 | Turbidity, severity of being unwell, severity of foul smell in urine, NGAL and MMP9 |

## Supplementary Materials

**Table S3:** Uro-pathogen or potential significant isolate used to define UTI positivity

| Potentially significant isolates                                 | Uropathogens                         |
|------------------------------------------------------------------|--------------------------------------|
| Enterobacteriaceae ( <i>E. coli</i> , <i>Klebsiella</i> species) | <i>E. coli</i>                       |
| <i>Proteus</i>                                                   | <i>Klebsiella</i> species            |
| <i>Enterococcus</i> species                                      | <i>Enterobacter</i> species          |
| <i>Staphylococcus aureus</i>                                     | <i>Citrobacter</i> species           |
| <i>Staphylococcus saprophyticus</i>                              | <i>Serratia</i> species              |
| Coagulase negative <i>Staphylococcus</i> species                 | <i>Morganella</i> species            |
| <i>Pseudomonas</i>                                               | <i>Proteus</i> species               |
| Yeasts                                                           | <i>Pantoea</i> species               |
|                                                                  | Group B <i>Streptococcus</i> species |
|                                                                  | <i>Staphylococcus saprophyticus</i>  |
|                                                                  | <i>Salmonella</i> species            |



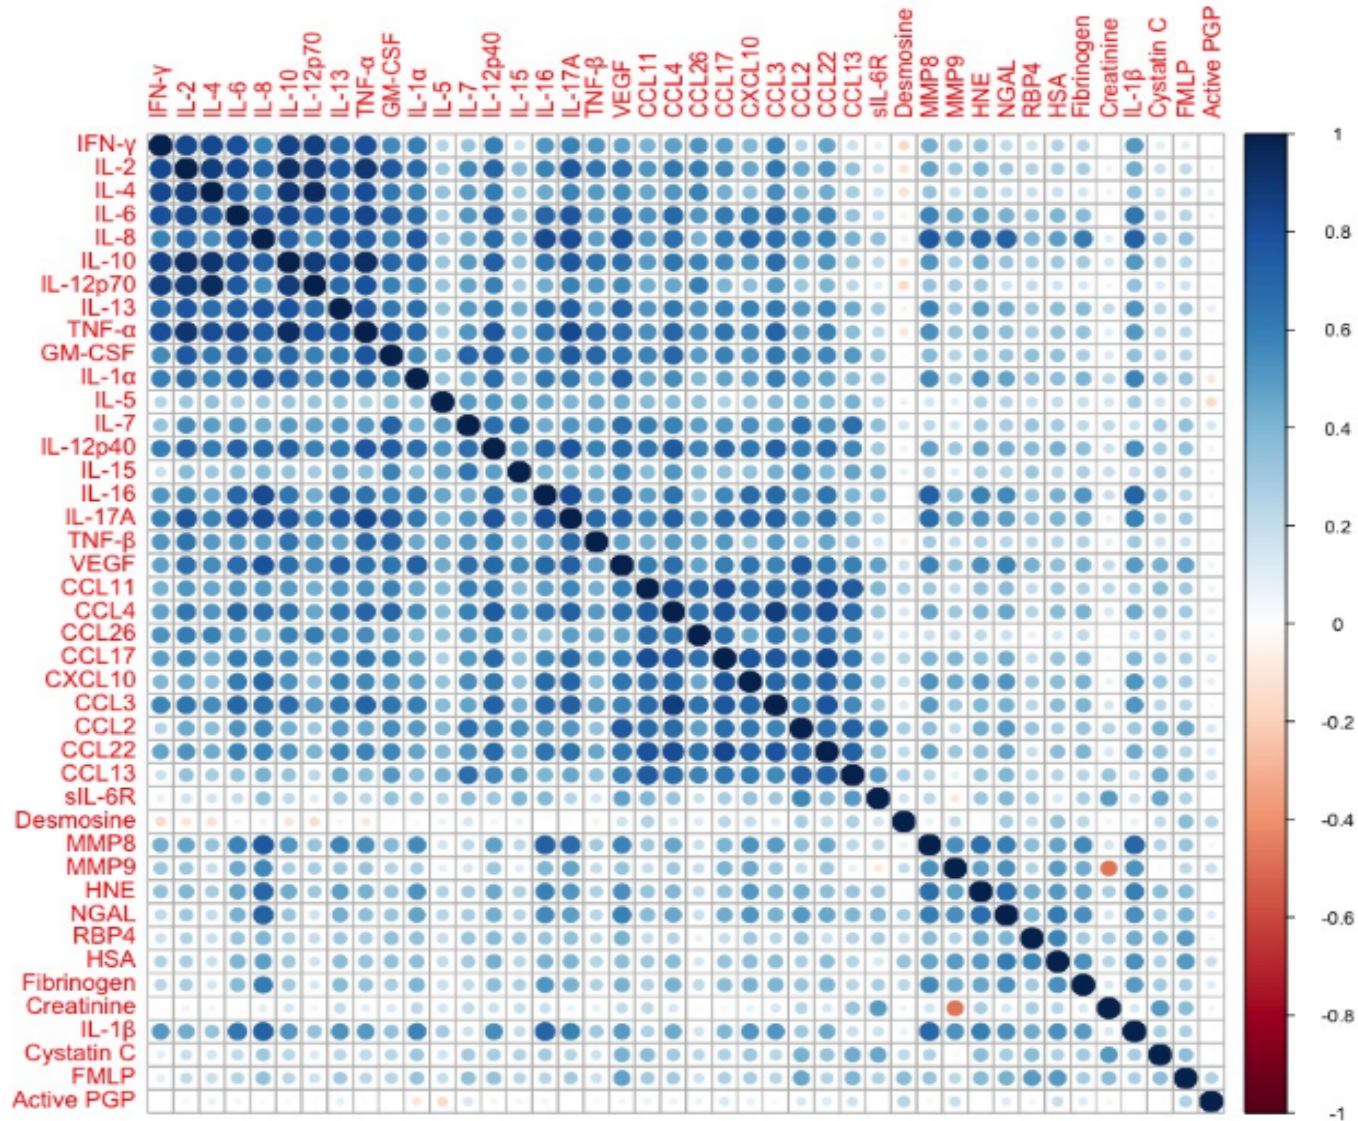

**Figure S1: Correlation between immunological markers.** Circle size and colour scale represent correlation strength and direction, respectively, between the 42 examined immunological markers. Spearman correlation test was used. R package “corrplot” was used for this visual presentation.

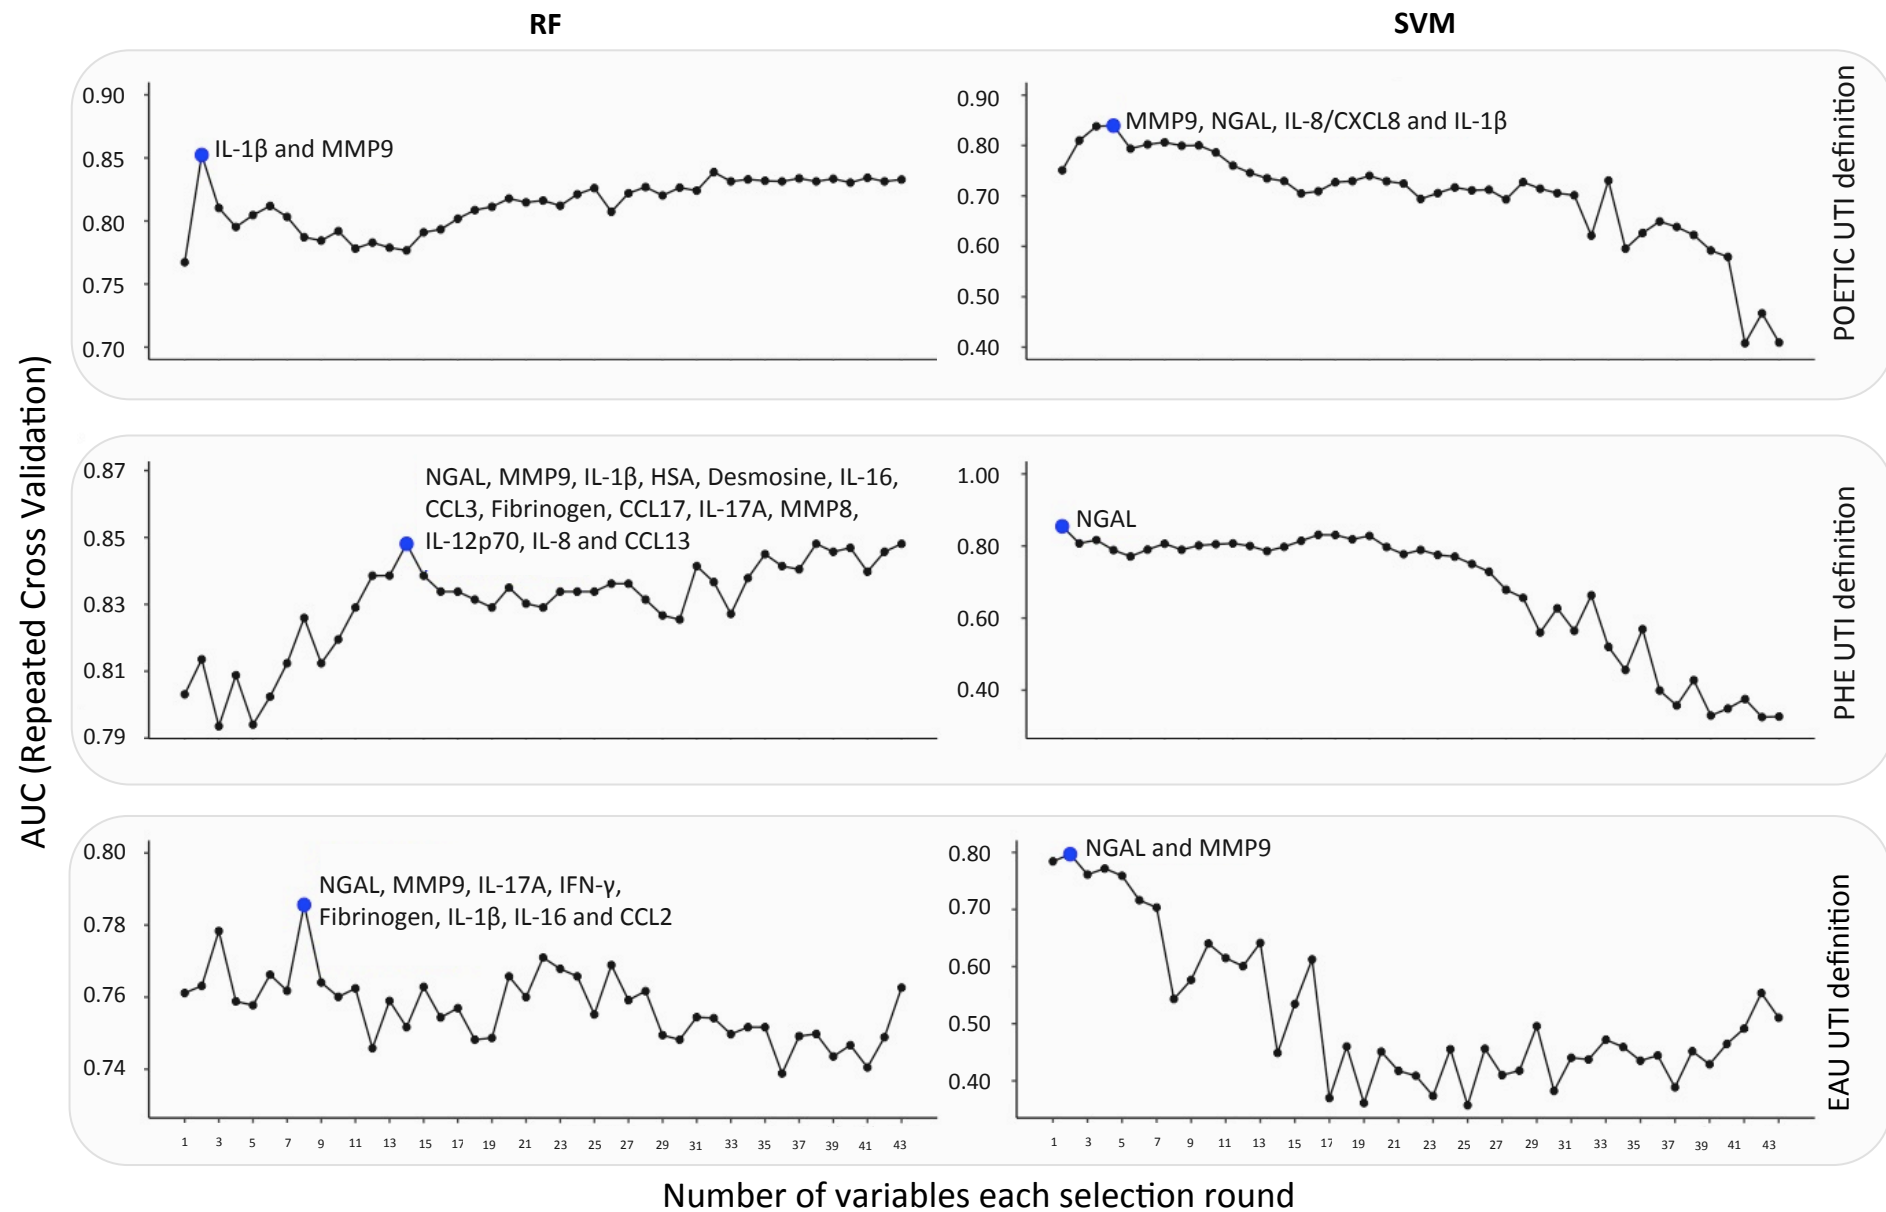

**Figure S2:** Feature selection among immunological markers using different UTI classification guidelines. POETIC: Point of care testing for urinary tract infection in primary care, PHE: Public Health England, EAU: European Association of Urology, AUC: Area under the ROC curve, RF: Random forest and SVM: Support vector machine

**A**

RF

SVM

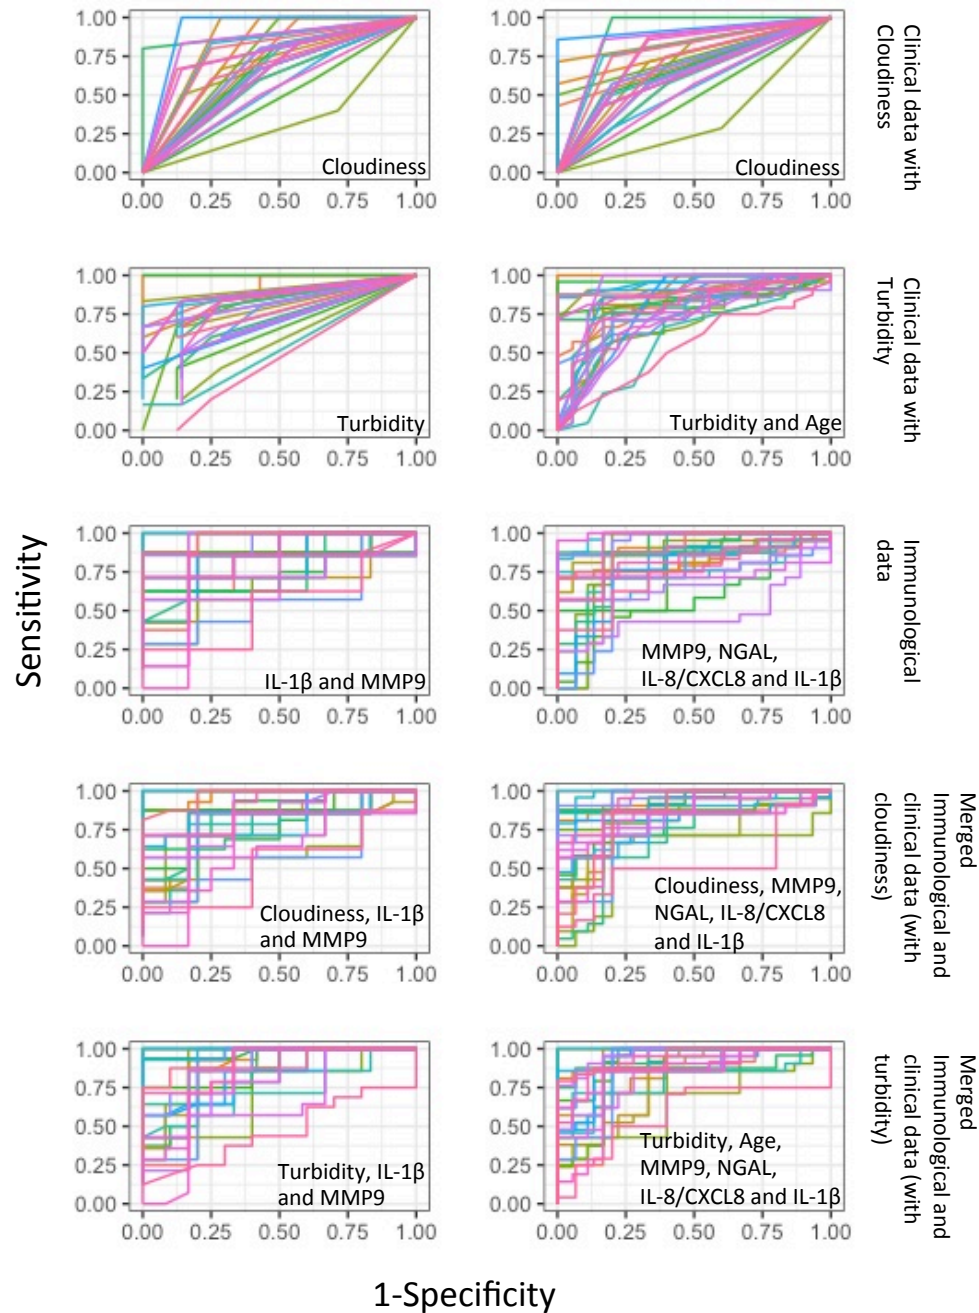

**Figure S3:** Area under the ROC curve for three repeats of 10-fold cross-validation from models following selection using RF- or SVM- recursive feature elimination. **A.** UTI classified according to the POETIC protocol (Point of care testing for urinary tract infection in primary care trial). **B.** UTI classified according to the Public Health England (PHE) guidelines. **C.** UTI classified according to the European Association of Urology (EAU) guidelines. Predictors included in the model following selection are given in text boxes within each plot. RF: random forest, SVM: support vector machine

**B**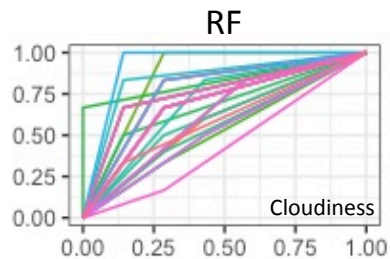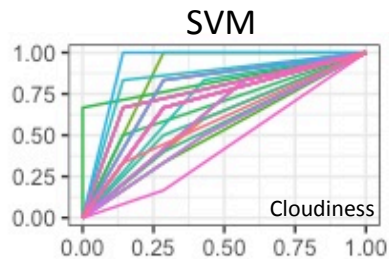Clinical data with  
Cloudiness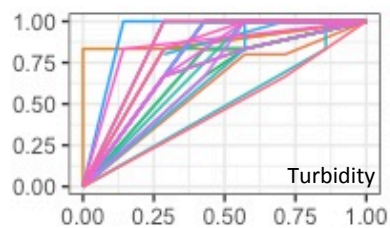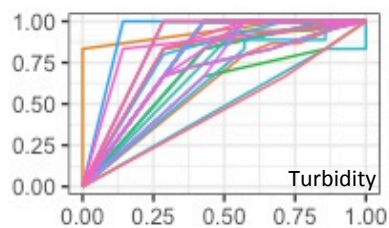Clinical data with  
Turbidity

Sensitivity

14 biomarkers were selected, therefore model was not considered and was not merged with cloudiness or turbidity

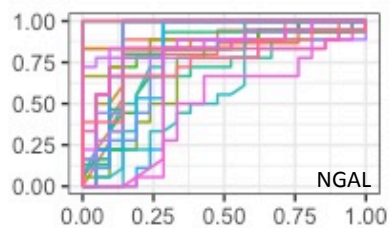Immunological  
data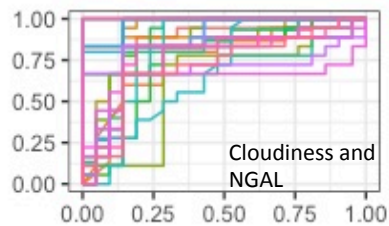Merged  
Immunological and  
clinical data (with  
cloudiness)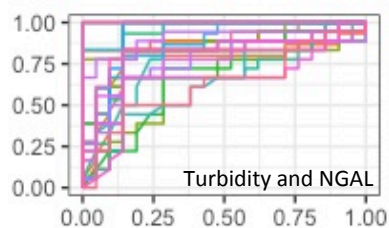Merged  
Immunological and  
clinical data (with  
turbidity)

1-Specificity

**C**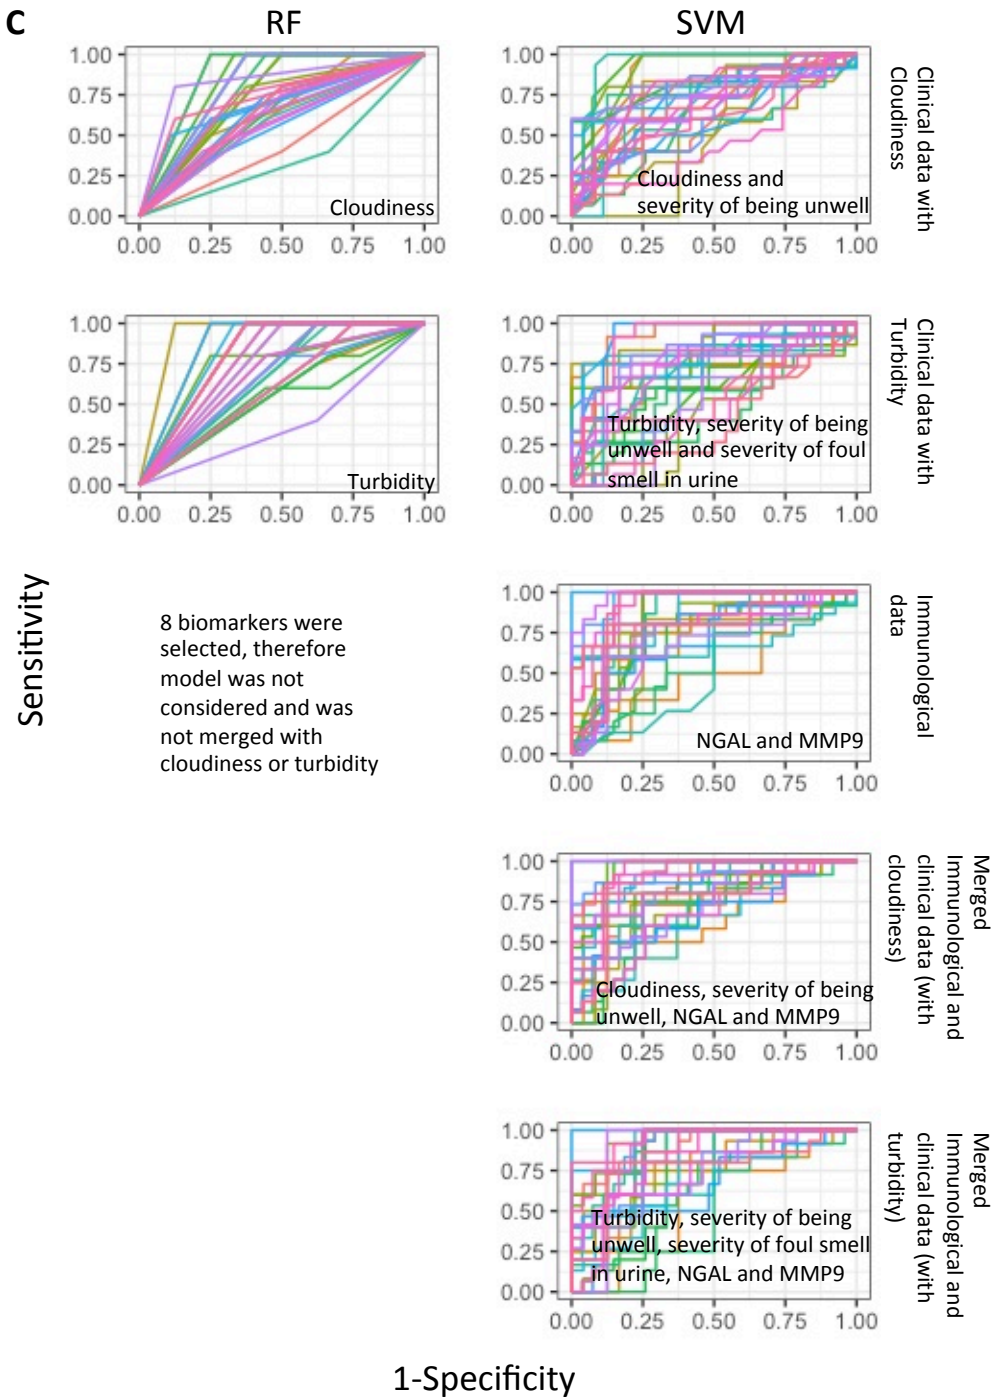

Supplement: 41598_2019_55523_MOESM1_ESM.pdf [file 41598_2019_55523_MOESM1_ESM.pdf]
